# Supplementary material
Source: PubMed Central journal article supplement (PMC1559774)
Supplement: pnas_0603530103_1.pdf [file pnas_0603530103_1.pdf]

M. extorquens AM1 ---MS-----TAQLVQVHLPYLRRYARALTGSGVAGDAYVAATLETLVNEPETLGRSTN 51  
E. litoralis, ABC64135 ---MS-----ASQKIAPNLPYLRRYARALTGSGQQTGDFVRRATLEAAIADSELKQDVSE 51  
C. crescentus, AAK25439 ---MS-----LKRILAPHLPLYRIRYARALTDGQTDGHDYVRVLALEALAEVLVDANLS 51  
Z. mobilis, YP\_163140 ---MP-----LGGQIAPYLPPLLRRYARALTDGQDTSGDRIVRATLEAITAABEIFFHDVD 51  
Bradyrhiz. sp., ZP\_00857197 ---MS-----RSQVVAEHLPLLRRYARALTGSGQSGDAYVGMALLEALIQDPLLDERYG 51  
N. winogradskyi, ABA06024 ---MF-----RSQVVAEHLPLLRRYARALTGSGSGDAYVGMALLEALIQDPLLDEQHG 51  
M. loti, NP\_104753 ---MS-----LSATIAPHLPLLRFRSAVSGSQESGGDALVAAMLEAITADVDFPDASS 51  
S. meliloti, CAC45311 ---MP-----LSTRIAPHLPLYRRYARAVTGSQAAAGDYVAAVLEALIDDLLEFPFAAS 51  
A. tumefaciens, AAK89273 ---MS-----VSTR IAPHLPLYRRYARAVCGSQSTGDAYVAATLEALIAIDISIFPQTS 51  
R. leguminosarum, CAC34399 ---MT-----LSTRIAPHLPLYRRYARALTGQTSQDAYVAAVLEAITADLSIFPD TAN 51  
B. bacilliformis, ZP\_00947047 ---MP-----LSTRIAPHLPLYRFRFARVGSQSGSDAYVAAMLEALITDISIFPVQSS 51  
R. rubrum, YP\_428367 MPATA-----VSQAVVHQLPLLRRYARALCGDQIAGDEVVKAAMLEVIVADPRVDDVT 54  
R. sphaeroides, ZP\_00915337 ---MTSDTTPFDLASVIGTNLPYLRRYARALTGSGQETGDRYAATLEAILEDTHIFEATES 57  
P. denitrificans, ZP\_00630518 ---MT-----AADLAQGISRELPYLRRYARALTGSGQTAGDNYAATLEAILTDRSLMDG-ED 53

M. extorquens AM1 VKADLFRVFTRIWNSLSVNG--HSDQV-----QHDLPAAEVRLGQITPLPRQAFLLSCLG 104  
E. litoralis, ABC64135 GRVPLYKAFNALWSSS---YLEVEGDDGGDVSAKAGAGDRKAVTFLNRQALLLTLED 109  
C. crescentus, AAK25439 PRVLYRVFHAIWLSGASLGHVDGQ---LHAGDD-AAQRLMRIAPRSQAFLLTAE 107  
Z. mobilis, YP\_163140 PRLGLYTVFHRILWQHTASLSAANHD---EGKGIATYSRLPIPTKSRQALLTAMEG 107  
Bradyrhiz. sp., ZP\_00857197 ARAGLFRLETQIWNVALND---DAEVA-----TLMPPPERLSNITPLPRQAFLLSLEG 104  
N. winogradskyi, ABA06024 ARAGLFRLETRIWNSVSVNG--GADEV-----PTLAPTERRLTNIPTPLPRQAFLLSLE 104  
M. loti, NP\_104753 DRIALYKVFAKLFTSVAIRVPPQEQAQS-----AWEQRANLNIAIAPLRQAFLLVAVEG 106  
S. meliloti, CAC45311 DRIGLYKLFCSLFEKLIKIDRTQLASPF-----AWEQRASANLSLIAPPQRQAFLLVALE 106  
A. tumefaciens, AAK89273 DRVSYLYQLFVSIFFSSTVINIKTDENLS-----GWEKRASANLSAVPALARQAFLLTVEE 106  
R. leguminosarum, CAC34399 DRIALYKLFQTFGSGTAVQIPEPTSPY-----AWEQRANLNIAIAPLRQAFLLVASVEN 106  
B. bacilliformis, ZP\_00947047 DRIGTYWLFCHLFDQTPNIAEPLPQF-----GFEQQANIQLSYLTPRARQAFLLIAVEG 106  
R. rubrum, YP\_428367 LKRVLYQLFHKVWMSAG--SLSPADSA-----ETDIQRVRSQLEPAEDRQALLLVAMEG 106  
R. sphaeroides, ZP\_00915337 PRVRFHFAEHLVWMSAGAPLG-EPEDSR-----LSQQRDHSMSRLFPNTRQALLLHAIEG 110  
P. denitrificans, ZP\_00630518 TRIGLFRFTFAHWQSSGQPVLEAQPSP-----REASAQHLRGLTPNSREALLLR TIE 107

M. extorquens AM1 FSEEDAGVILDVDSKVRDLVDEAGRELAADMAATELIIIEDEPLIAMDL EALVEGLGHNV 164  
E. litoralis, ABC64135 FSVEDAAEIMGLAPADVEGLVREAVAEIDRESSTNVLIIIEDEPLISMQL EDLVRSLGHI 169  
C. crescentus, AAK25439 FTPTBAQQIILD CDFEVERLIGDQAQIEIDAE LA TEVLIIIEDEPVIAADIEALVREGLHDV 167  
Z. mobilis, YP\_163140 FSPKDSAYLMDVSEDQI DAWLQEAISEIDRQIHSKVLVIEDEPIIAFDIESLVRDLGHDV 167  
Bradyrhiz. sp., ZP\_00857197 FPEEVAVLDIDVAE TRRLADAQRELAAEIATDVLIIIEDETFIAMDLES LKNGHNV 164  
N. winogradskyi, ABA06024 FSEDEAAFVLEVDIAEVRRLSGIAGREMAAEIATDVLIIIEDETFIAMDLES LKNGHNV 164  
M. loti, NP\_104753 FSEDEAAEILDVGDQGFSELLAQASNEISRQVATDVLIIIEDEPLIAMDIEMVESLGRHV 166  
S. meliloti, CAC45311 FSTEGAAEIMGLDQCAFGLKLLTSASNEISRQIATDVMIIEDEPLIADIEDMVTS LGRHV 166  
A. tumefaciens, AAK89273 FTFPSETAEVLRVSEDOVSRILIDEAASEIARQVATDMITIEDEPLIAMDIEQMVTDLGHRV 166  
R. leguminosarum, CAC34399 FFRVAEIAEILETEQDVMHLLDVA SQEISRQVATDMITIEDEPLIAMDIEQMVESLGRHV 166  
B. bacilliformis, ZP\_00947047 FNEARESEIMNIDTQTFHFLNQASLDISEQMTQILIIIEDEPLIAMDIEQMVESLGHKV 166  
R. rubrum, YP\_428367 FTLAEAMVIGRDDSQTAALVDQARLAMAQQESTRVLVIEDEPIIGLDIANIVESMGHRV 166  
R. sphaeroides, ZP\_00915337 FHHEEIGAIMQIDAAEAELIEIAQREMANSVAGRIMVIEDEAIAMDIVAIVREMGHGV 170  
P. denitrificans, ZP\_00630518 LRYDQIAAVMQPCPAEAEEVLQIALNEMSQALTKVMVIEDETFIAMDLKGI VQAMGHV 167

M. extorquens AM1 IGVARTREAVKIASERKPG LILADIQLADGSSGIDAVNDLLKTF-EVVFVITAYPER 223  
E. litoralis, ABC64135 AGTAATRTQAQEAVA-KEKPGVLVADIQLADGSSGIDAVNDILGQF-DVPVIFITAYPER 227  
C. crescentus, AAK25439 TDIAATRGEALEAVT-RRTPGLVLADIQLADGSSGIDAVKDILGRM-DVPVIFITAFPER 225  
Z. mobilis, YP\_163140 IGIATTRDEAVSMK--NKPGLILSDIQLADSSGIDAVDQILKEI-DVPVIFITAFPER 225  
Bradyrhiz. sp., ZP\_00857197 IGVARTHADAVLAK--NKPGLILADIQLADGSSGIDAVNELLRTF-EVVFVITAYPER 222  
N. winogradskyi, ABA06024 IGVARTHADAIALK-TKEPGLIADIQLADGSSGIDAVNELLRVV-EVVFVITAYPER 222  
M. loti, NP\_104753 VGTARTHEAEVMFG-KTRPKMVLADIQLADGSSGIEAVNEILSSD-SVVFVIFITAFPER 224  
S. meliloti, CAC45311 TGIARTREALNLYH-QTSPKMLVADIQLADGSSGIDAVNDILTQA-SVVFVITAFPER 224  
A. tumefaciens, AAK89273 TGIARTHTFALDLFH-RTPQPKMLADIQLADGSSGIDAMKDILQMT-TLVPVIFITAFPER 224  
R. leguminosarum, CAC34399 TGIARTHEAEVALYN-KTKPSMVLADIQLADGSSGIDAVNDILKTS-SVVFVIFITAFPER 224  
B. bacilliformis, ZP\_00947047 VGVARTSEAMAMFG-QKRPKMLADIQLADSSGIDTVNDILKNE-CIPVIFITAFPER 224  
R. rubrum, YP\_428367 VGIATTRAEEAMAL-KEKPGVLVADIQLADGSSGIDANSILAGA-DIPVIFITAYPER 224  
R. sphaeroides, ZP\_00915337 TGIARTRTEAVALAA-KEKPD LILADIQLADSSGIDAVNDIRKQFEDIPVIFITAFPER 229  
P. denitrificans, ZP\_00630518 TGIARTHAAAI DLAH-QSRPDLILADIQLADGSSGIEAVNELLSSMGDIPVIFITAFPER 226

M. extorquens AM1 FLTGERPEPAFLIAKPFQ PANVSAVISQALFFQ SARREAHNA-- 267  
E. litoralis, ABC64135 LLTGDRPEPTYLVTKPFQESTVRTTISQALFFQNSPTAV----- 266  
C. crescentus, AAK25439 LLTGERPEPTFLITKPFQPEYTKAAQIQLFFPRRTAKAA----- 266  
Z. mobilis, YP\_163140 LLTGERPEPTFLITKPFQVDTIKATIAQALFCNPLSLAA----- 264  
Bradyrhiz. sp., ZP\_00857197 FLTGERPEPAFLISKPFQ PAMVSAVASQALFFQRNSRMRMPKFAA- 267  
N. winogradskyi, ABA06024 FLTGERPEPAFLISKPFQ PAMVSAVASQALFFQRNSRNRPRPAAAS 268  
M. loti, NP\_104753 LLTGERPEPAFLVTKPFNPDMVKALISQALFFDRQA KAAA----- 264  
S. meliloti, CAC45311 LLTGKKEPEPAFLVTKPFNPETVKALISQALFFDEHAQAGAS----- 265  
A. tumefaciens, AAK89273 LLTGERPEPTFLVTKPFNPDMVKALISQALFFNESSRVAA----- 264  
R. leguminosarum, CAC34399 LLTGERPEPTFLVTKPFNPDMVKALISQALFFNESSRVAA----- 264  
B. bacilliformis, ZP\_00947047 LLTGERPEPTFLVSKPFNPDMVKALISQALFFQENASKAA----- 264  
R. rubrum, YP\_428367 LLTGQRPEPTYLVTKPFQAVDTKVITIAQALFFRQAQKPVAAE----- 265  
R. sphaeroides, ZP\_00915337 LLTGKRPEPAFLITKPYSEDOVRSVAVSQAMFFSSTETLSA----- 269  
P. denitrificans, ZP\_00630518 LLTGDRPEPAFLISKPYSEQVRSVAVSQAMFFFASTBGLSVA----- 267
