# Supplementary material
Source: PubMed Central journal article supplement (PMC1559774)
Supplement: pnas_0603530103_2.pdf [file pnas_0603530103_2.pdf]

**Table 3. List of proteins from *M. extorquens* AM1 found to be repressed during phyllosphere colonization**

| Spot number | RMQ number | Gene product                          | CD search                     | <i>Mr</i> | <i>pI</i> | ratio MM/P |
|-------------|------------|---------------------------------------|-------------------------------|-----------|-----------|------------|
| s1          | RMQ12368   | Unknown function                      |                               | 12.7      | 6.6       | +          |
| s2          | RMQ02526   | 30s ribosomal protein S6              | pfam01250                     | 19.8      | 9.3       | +          |
| s3          | RMQ08264   | 50s ribosomal protein L9              | pfam01281 pfam03948           | 20.9      | 5.4       | +          |
| s5          | RMQ02665   | GreA                                  | pfam01272 pfam03449           | 22.1      | 6.9       | +          |
| s6          | RMQ05614   | ATP synthase epsilon subunit          | pfam02823                     | 14.6      | 4.7       | ∞          |
| s7          | RMQ09038   | Unknown function                      | pfam01709                     | 28.6      | 4.9       | ∞          |
| s8          | RMQ06290   | 50s ribosomal protein L25             | pfam01386                     | 15.2      | 10.0      | +          |
| s9, s10     | RMQ05623   | RNAP alpha subunit                    | pfam01193 pfam03118           | 39.9      | 5.2       | +          |
| s11a        | RMQ06487   | Succinyl-CoA synthetase, beta subunit | pfam00549 pfam02222           | 39.5      | 4.7       | +          |
| s11b        | RMQ00285   | 3-isopropylmalate dehydrogenase       | pfam00180                     | 40.5      | 5.1       | +          |
| s13         | RMQ07697   | Heat shock protein 33                 |                               | 38.2      | 5.6       | +          |
| s14         | RMQ01798   | ATP synthase F1, beta subunit         | pfam00006 pfam00306           | 37.6      | 5.0       | +          |
| s15, s16    | RMQ06933   | EF-Ts                                 | pfam00889                     | 35.1      | 5.8       | +          |
| s17         | RMQ02434   | Cysteine synthase                     | pfam00291                     | 35.9      | 6.2       | ∞          |
| s18         | RMQ11948   | D-3-phosphoglycerate dehydrogenase    | pfam02826 pfam00389           | 39.8      | 6.6       | ∞          |
| s19         | RMQ05335   | Fumarase                              | pfam00206                     | 49.7      | 5.7       | +          |
| s23a        | RMQ09543   | Propionyl-CoA carboxylase             | pfam01039                     | 56.0      | 6.0       | +          |
| s23b        | RMQ12949   | AlCARFT/IMPCHase bienzyme             | pfam01808 pfam02142           | 60.9      | 6.2       | +          |
| s25         | RMQ08576   | Unknown function                      |                               | 45.2      | 6.2       | ∞          |
| s27, s28    | RMQ09615   | GTP-binding protein TypA              | pfam00009 pfam00679 pfam03144 | 73.9      | 6.9       | +          |
